# Supplementary material for: GloLakes: water storage dynamics for 27 000 lakes globally from 1984 to present derived from satellite altimetry and optical imaging
Source: Copernicus journal article supplement (doi:10.5194/essd-16-201-2024), 2024-01-11
Supplement: Supplementary file 1 [file essd-16-201-2024-supplement.pdf]

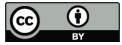

*Supplement of*

## **GloLakes: water storage dynamics for 27 000 lakes globally from 1984 to present derived from satellite altimetry and optical imaging**

**Jiawei Hou et al.**

*Correspondence to:* Jiawei Hou ([jiawei.hou@anu.edu.au](mailto:jiawei.hou@anu.edu.au))

The copyright of individual parts of the supplement might differ from the article licence.

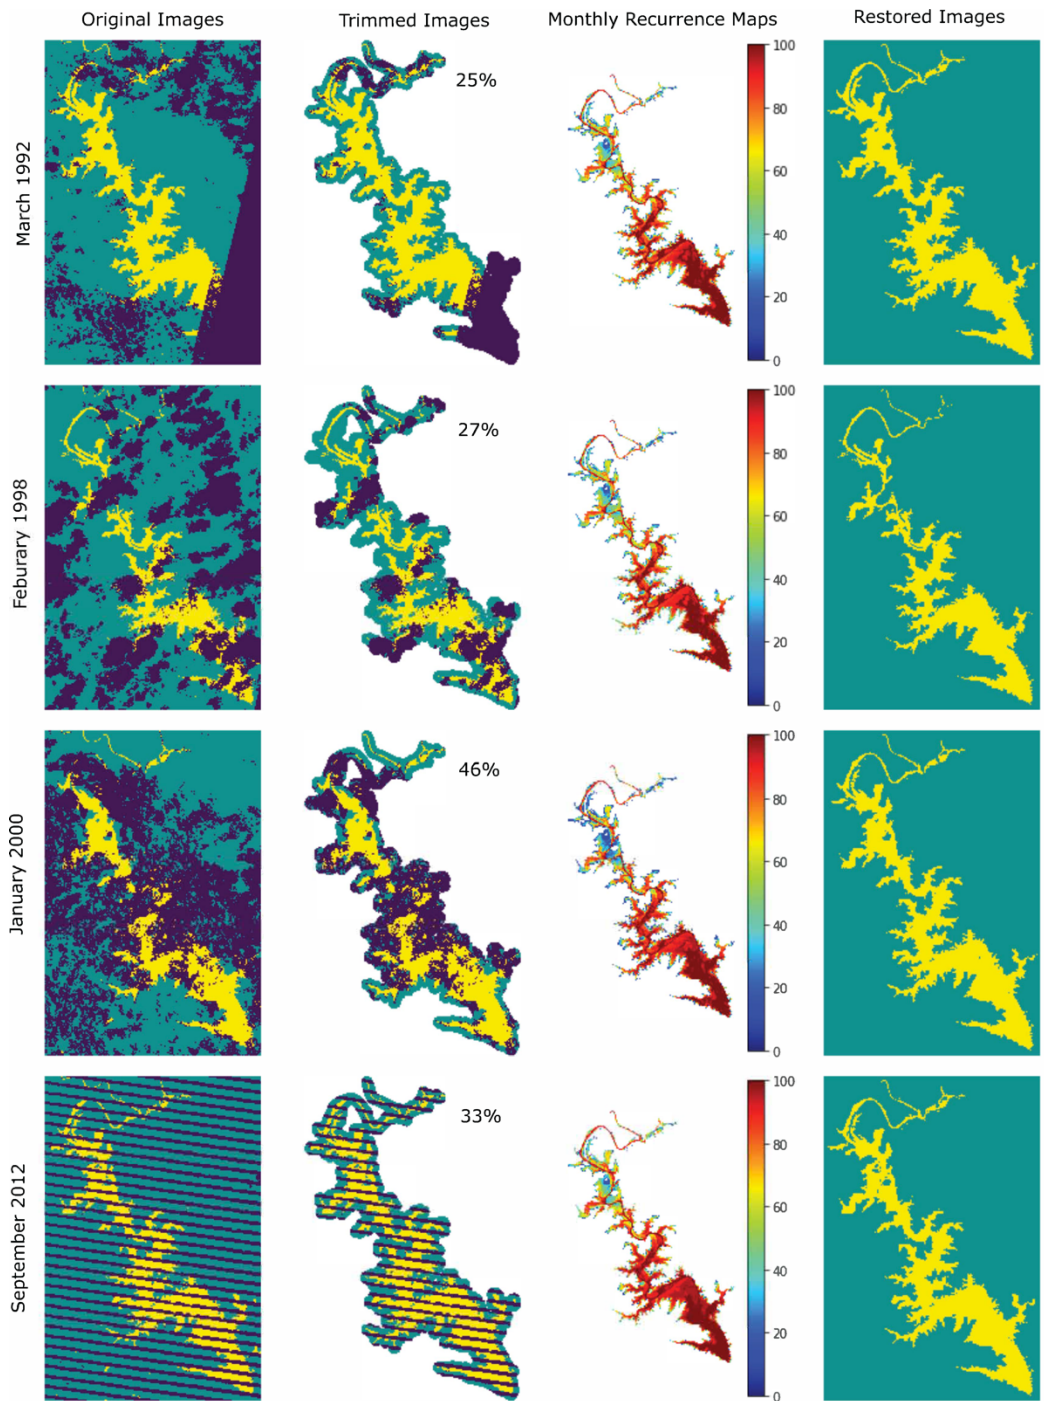

**Figure S1** As in Fig. 1 but for Lake Wivenhoe, Australia. (First column: historical water maps from GSWD (yellow: water; green: land; blue: no data image contaminated ratio from top to bottom: 25%, 27%, 46 % and 33%); second column: historical water maps trimmed by the lake boundary from HydroLAKES with a 500 m buffer (number: contamination ratio); third column: water recurrence (0~100%) maps at the specific month; fourth column: restored water maps)

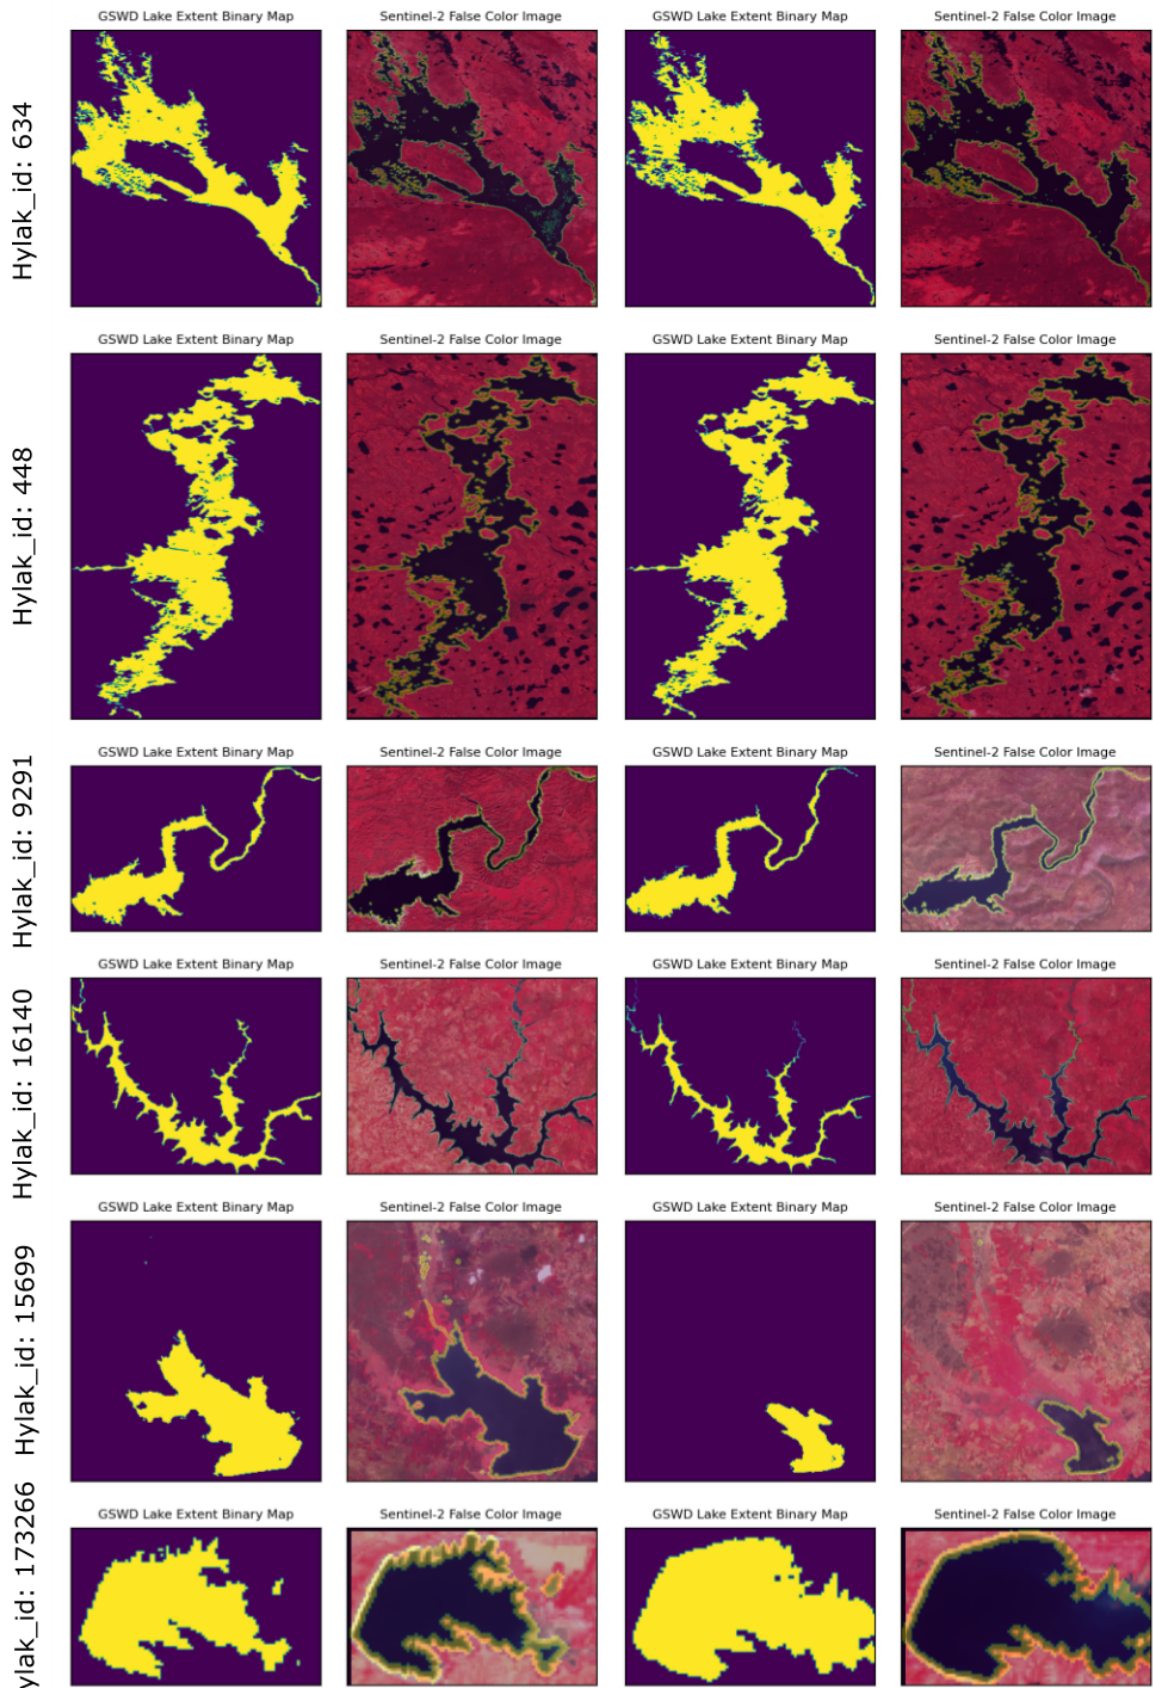

**Figure S2.** Comparisons between GSWD lake extent binary map (yellow: wet pixels; blue: dry pixels) and Sentinel-2 false color imagery (yellow line: derived lake extent boundaries) at different time for selected 20 lakes around the world.

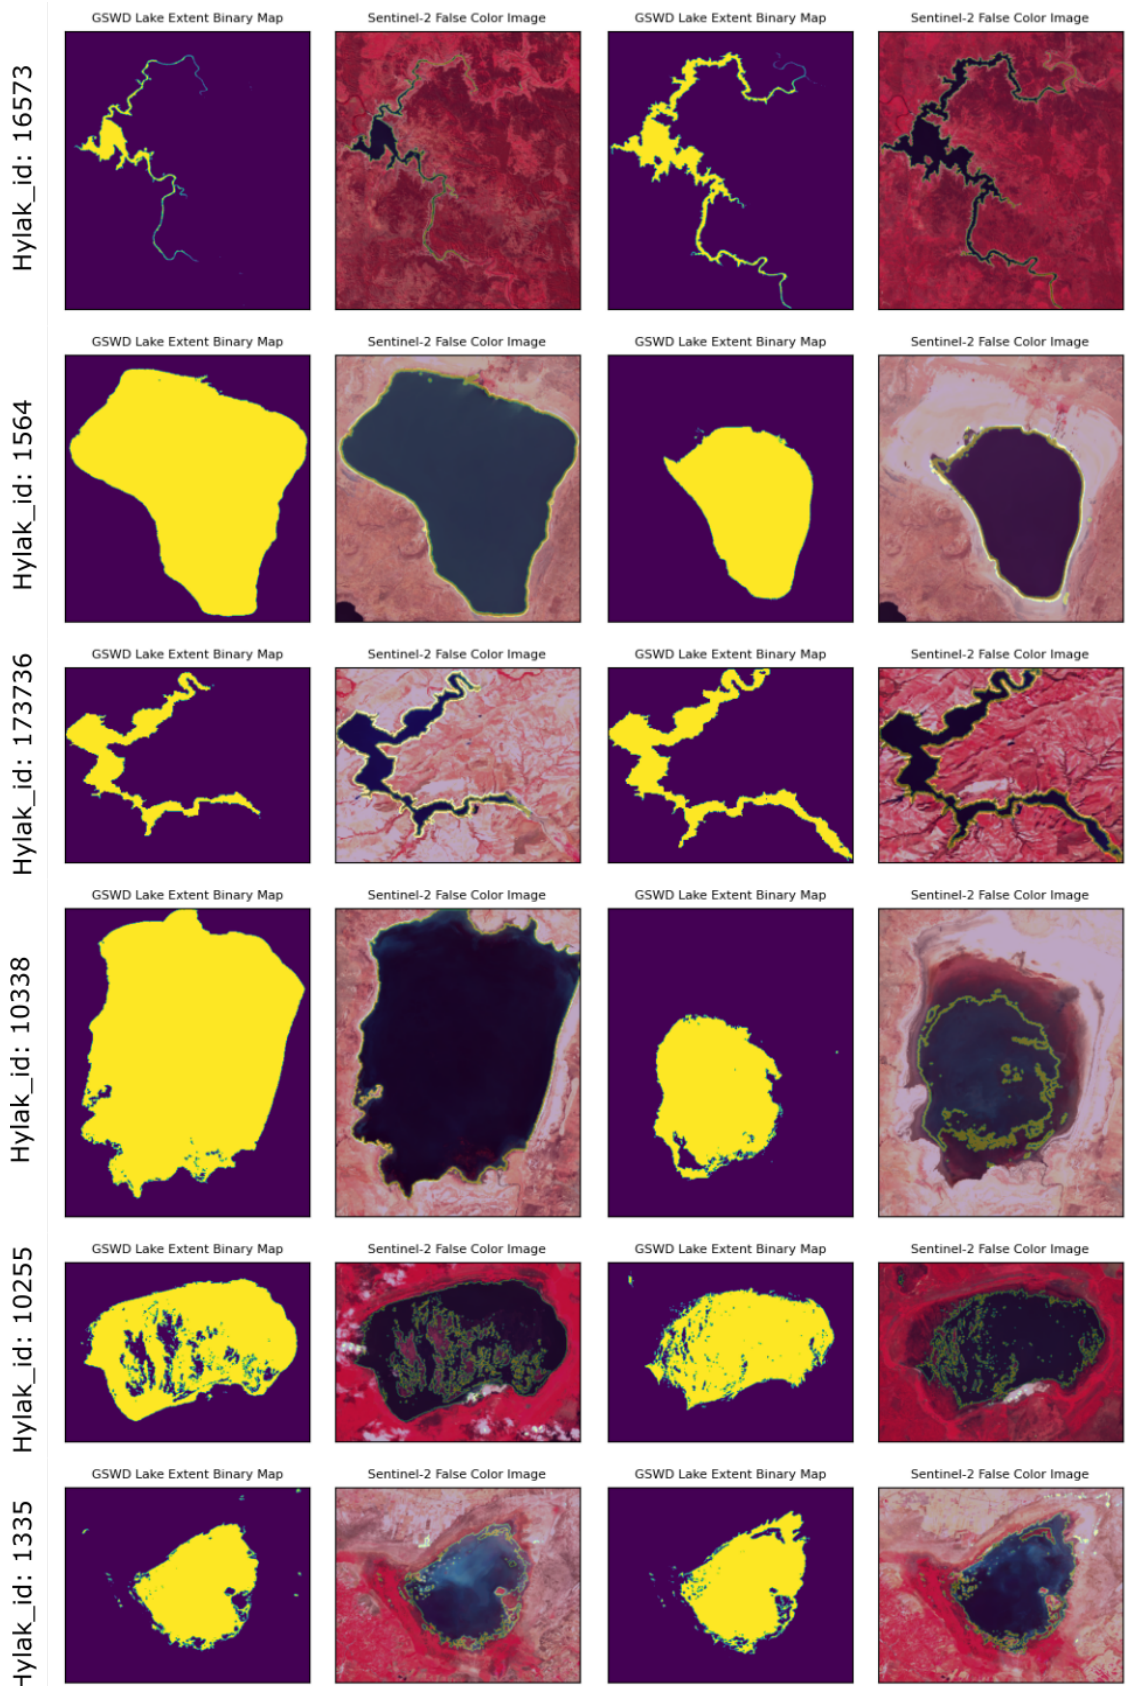

**Figure S2 (continued).** Comparisons between GSWD lake extent binary map (yellow: wet pixels; blue: dry pixels) and Sentinel-2 false color imagery (yellow line: derived lake extent boundaries) at different time for selected 20 lakes around the world.

Hylak\_id: 11579  
Hylak\_id: 15448  
Hylak\_id: 1092  
Hylak\_id: 9372  
Hylak\_id: 15723  
Hylak\_id: 161113

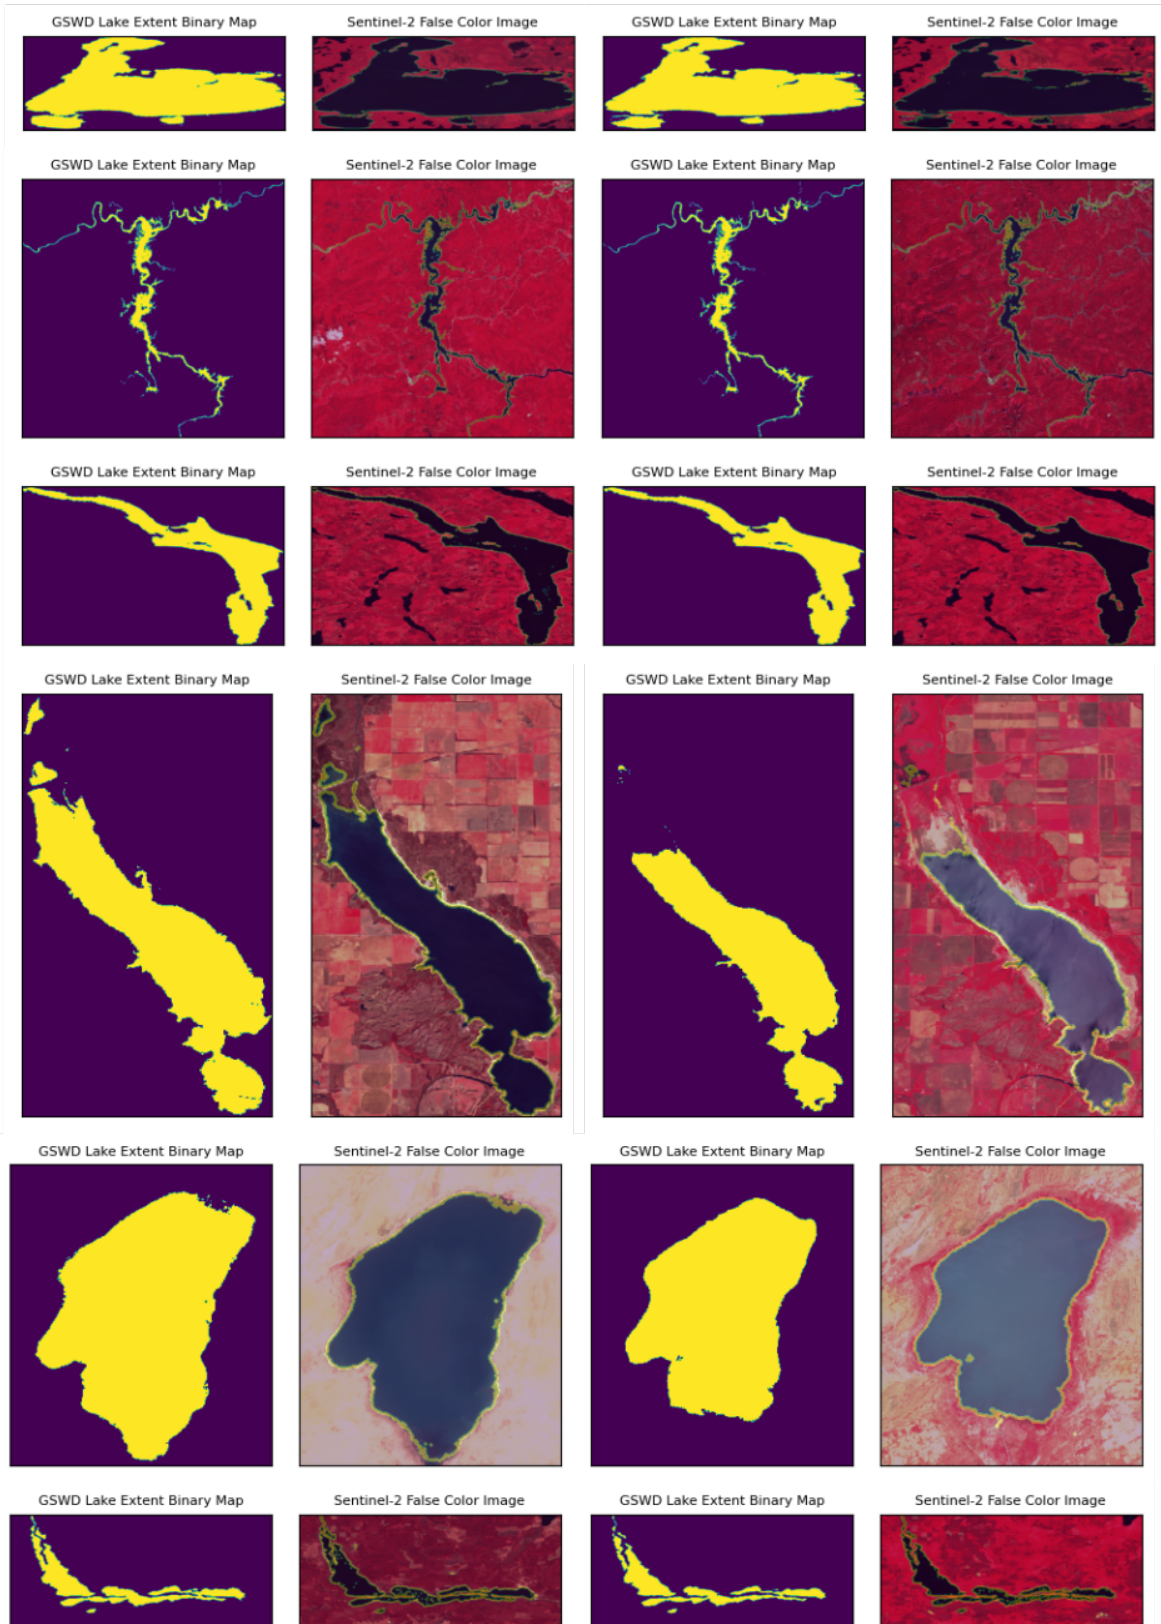

**Figure S2 (continued).** Comparisons between GSWD lake extent binary map (yellow: wet pixels; blue: dry pixels) and Sentinel-2 false color imagery (yellow line: derived lake extent boundaries) at different time for selected 20 lakes around the world.

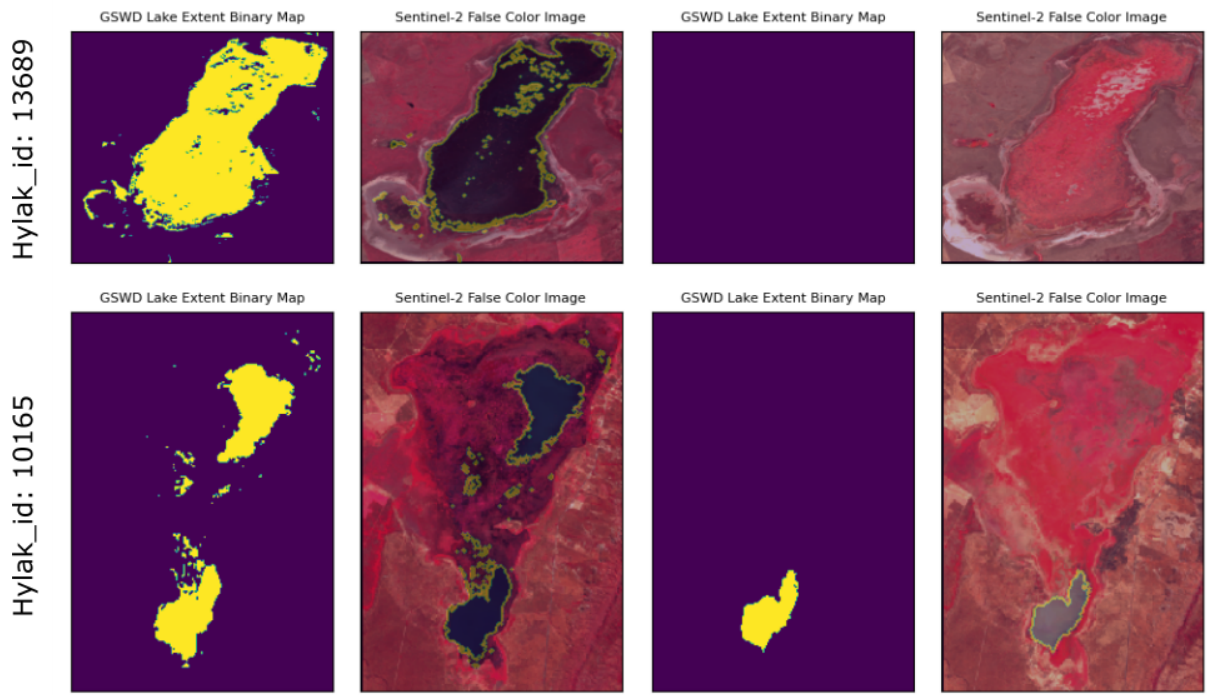

**Figure S2 (continued).** Comparisons between GSWD lake extent binary map (yellow: wet pixels; blue: dry pixels) and Sentinel-2 false color imagery (yellow line: derived lake extent boundaries) at different time for selected 20 lakes around the world.

**Table S1** Comparison results of lake extent estimates derived between GSWD (Landsat) and Sentinel-2 (statistics results from Figure S2)

| ID     | Lake Name         | Country                  | Latitude | Longitude | Date    | GSWD (Landsat) lake extent (km <sup>2</sup> ) | Sentinel-2 lake extent (km <sup>2</sup> ) | Difference (%) |
|--------|-------------------|--------------------------|----------|-----------|---------|-----------------------------------------------|-------------------------------------------|----------------|
| 634    | Petit Manicouagan | Canada                   | 51.82    | -67.80    | 2020-06 | 312                                           | 313                                       | 0.32           |
| 634    | Petit Manicouagan | Canada                   | 51.82    | -67.80    | 2019-07 | 305                                           | 320                                       | 4.69           |
| 448    |                   | Canada                   | 58.28    | -96.99    | 2019-07 | 226                                           | 227                                       | 0.44           |
| 448    |                   | Canada                   | 58.28    | -96.99    | 2021-08 | 229                                           | 224                                       | 2.23           |
| 9291   | Millerton Lake    | United States of America | 37.00    | -119.70   | 2020-02 | 17.3                                          | 17.5                                      | 1.14           |
| 9291   | Millerton Lake    | United States of America | 37.00    | -119.70   | 2020-09 | 15.2                                          | 14.9                                      | 2.01           |
| 16140  | Gove              | Angola                   | -13.45   | 15.87     | 2021-02 | 101                                           | 102                                       | 0.98           |
| 16140  | Gove              | Angola                   | -13.45   | 15.87     | 2019-04 | 76                                            | 78                                        | 2.56           |
| 15699  |                   | India                    | 17.23    | 79.52     | 2019-02 | 10.7                                          | 11.3                                      | 5.31           |
| 15699  |                   | India                    | 17.23    | 79.52     | 2019-04 | 2.92                                          | 3                                         | 2.67           |
| 173266 |                   | Uzbekistan               | 38.87    | 66.42     | 2019-09 | 1.84                                          | 1.83                                      | 0.55           |
| 173266 |                   | Uzbekistan               | 38.87    | 66.42     | 2019-05 | 2.7                                           | 2.8                                       | 3.57           |
| 16573  | Burrendong        | Australia                | -32.67   | 149.11    | 2019-04 | 16.8                                          | 17                                        | 1.18           |
| 16573  | Burrendong        | Australia                | -32.67   | 149.11    | 2021-02 | 45.4                                          | 45.2                                      | 0.44           |
| 1564   | Abayata           | Ethiopia                 | 7.61     | 38.61     | 2021-01 | 150                                           | 149                                       | 0.67           |
| 1564   | Abayata           | Ethiopia                 | 7.61     | 38.61     | 2019-01 | 71.2                                          | 70.5                                      | 0.99           |
| 173736 | Vadomojon         | Spain                    | 37.64    | -4.23     | 2019-08 | 4.97                                          | 5.06                                      | 1.78           |
| 173736 | Vadomojon         | Spain                    | 37.64    | -4.23     | 2019-02 | 6.93                                          | 7.19                                      | 3.62           |
| 10338  | Pozuelos          | Argentina                | -22.32   | -65.99    | 2019-05 | 95                                            | 98.6                                      | 3.65           |
| 10338  | Pozuelos          | Argentina                | -22.32   | -65.99    | 2019-11 | 31.4                                          | 33.3                                      | 5.71           |
| 10255  | Baia Grande       | Brazil                   | -15.53   | -60.19    | 2020-03 | 56.6                                          | 51.7                                      | 9.48           |
| 10255  | Baia Grande       | Brazil                   | -15.53   | -60.19    | 2021-06 | 43.7                                          | 40.3                                      | 8.44           |
| 1335   | Aksehir           | Turkey                   | 38.51    | 31.42     | 2019-07 | 91                                            | 85.5                                      | 6.43           |
| 1335   | Aksehir           | Turkey                   | 38.51    | 31.42     | 2020-07 | 96                                            | 92                                        | 4.35           |
| 11579  |                   | Russia                   | 67.76    | 124.22    | 2021-06 | 191.8                                         | 189                                       | 1.48           |
| 11579  |                   | Russia                   | 67.76    | 124.22    | 2020-08 | 186                                           | 183                                       | 1.64           |
| 15448  |                   | China                    | 26.71    | 117.12    | 2019-09 | 31.8                                          | 33.1                                      | 3.93           |
| 15448  |                   | China                    | 26.71    | 117.12    | 2021-01 | 31.6                                          | 32                                        | 1.25           |
| 1092   | Flasjon           | Sweden                   | 64.14    | 15.91     | 2020-05 | 254                                           | 252                                       | 0.79           |
| 1092   | Flasjon           | Sweden                   | 64.14    | 15.91     | 2021-07 | 254                                           | 253                                       | 0.40           |
| 9372   | Lake Altus        | United States of America | 34.89    | -99.29    | 2019-03 | 22.9                                          | 22.1                                      | 3.62           |
| 9372   | Lake Altus        | United States of America | 34.89    | -99.29    | 2021-06 | 15.9                                          | 16                                        | 0.62           |
| 15723  |                   | Mali                     | 15.78    | -4.53     | 2019-03 | 36.4                                          | 36.1                                      | 0.83           |
| 15723  |                   | Mali                     | 15.78    | -4.53     | 2019-09 | 28.9                                          | 29.1                                      | 0.69           |
| 161113 |                   | Russia                   | 56.00    | 28.71     | 2019-04 | 10.5                                          | 10.6                                      | 0.94           |
| 161113 |                   | Russia                   | 56.00    | 28.71     | 2021-06 | 9.3                                           | 9.5                                       | 2.11           |
| 13689  |                   | Kazakhstan               | 51.37    | 61.86     | 2021-05 | 30.6                                          | 29.2                                      | 4.79           |
| 13689  |                   | Kazakhstan               | 51.37    | 61.86     | 2021-09 | 0                                             | 0                                         | 0.00           |

---

|       |        |        |        |         |      |      |      |
|-------|--------|--------|--------|---------|------|------|------|
| 10165 | Brazil | -10.23 | -44.68 | 2021-07 | 3.4  | 3.2  | 6.25 |
| 10165 | Brazil | -10.23 | -44.68 | 2019-09 | 0.93 | 0.91 | 2.20 |

---
